# Supplementary material
Source: PubMed Central journal article supplement (PMC5626647)
Supplement: NIHMS900323-supplement-1.pdf [file NIHMS900323-supplement-1.pdf]

**A**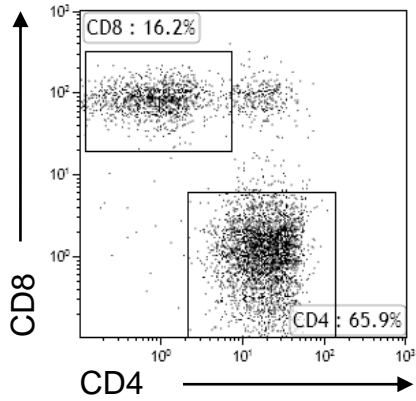**B**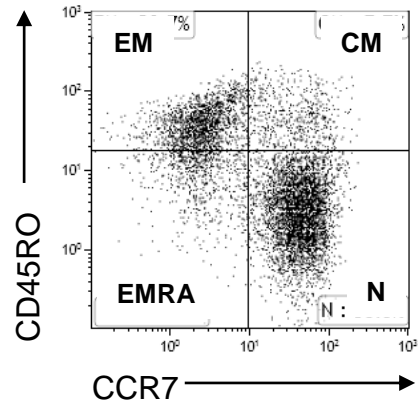**C**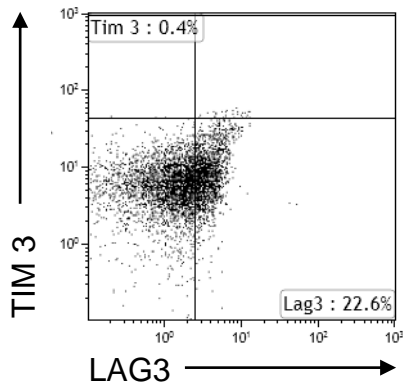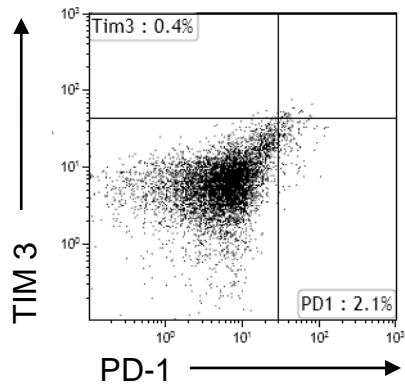

**Supplementary Figure 1: T-cell immunophenotyping by flow cytometry.** (A) Determination of CD8<sup>+</sup> and CD4<sup>+</sup> distribution using CD4 PE and CD8 APC antibodies. (B) CCR7 and CD45 RO gating strategy using CCR7 FITC and CD45 RO PercP Cy5.5. (C) Determination of expression of exhaustion markers (TIM3 PercP Cy5.5, Lag3 Pacific Blue and PD1 PE Cy7).

**A**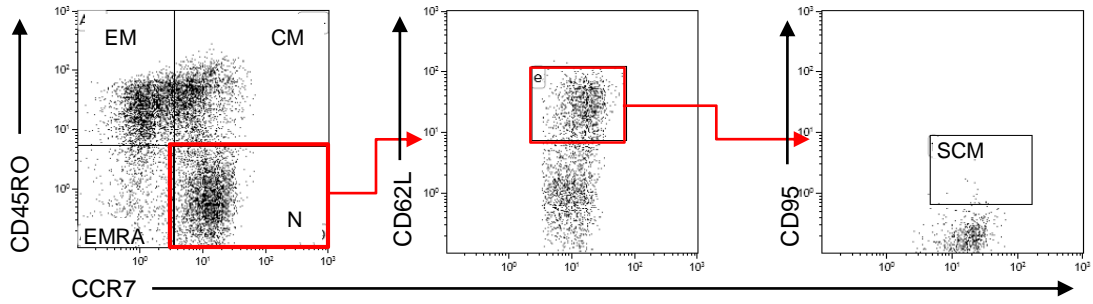**B**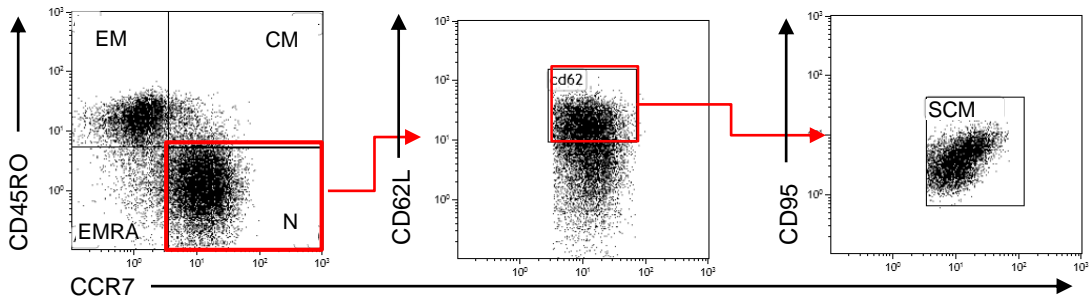**C**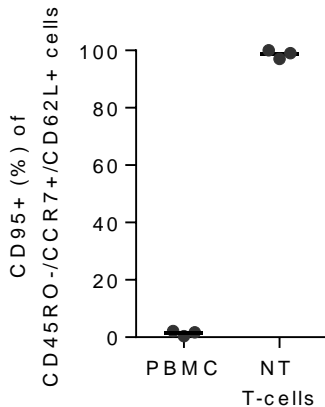

**Supplementary Figure 2: Determination of TSCM presence in PBMC and NT T-cells by flow cytometry.** Determination of TSCM cells (CD45RO<sup>-</sup>/CCR7<sup>+</sup>/CD95<sup>+</sup>) using CCR7 FITC, CD45 RO PercP Cy5.5, CD62L APC and CD95 Pac Blue. **(A)** CD3<sup>+</sup> T-cells were selected from PBMCs using Miltenyi beads prior to staining. Representative example. **(B)** Nontransduced T-cells (NT) were activated with CD3/CD28 MAbs and expanded with IL7/IL15 prior to staining. Representative example. **(C)** Summary data.

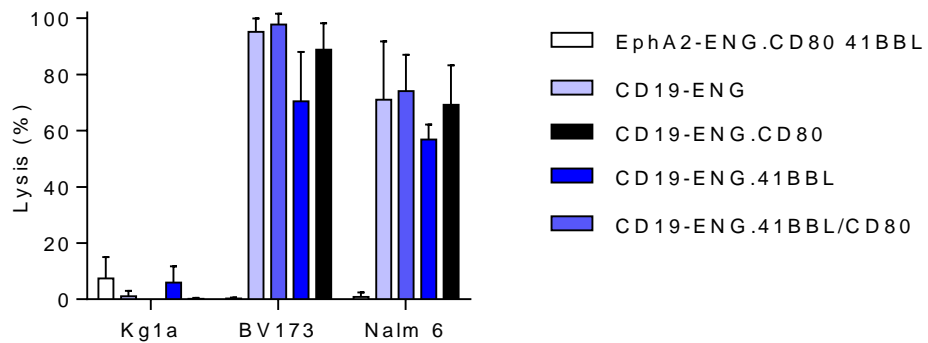

**Supplementary Figure 3: CD19-ENG T-cells and CD19-ENG T-cells expressing CD80 and/or 41BBL kill Nalm 6 cells efficiently.** Cytotoxicity assays were performed using CD19-ENG, CD19-ENG.CD80, CD19-ENG.41BBL, CD19-ENG.41BBL/CD80 and EphA2-ENG,41BBL/CD80 T cells as effectors and CD19-positive (Nalm 6, BV173) and negative (Kg1a) tumor cells as targets at a E:T ratio of 20:1 (n=3; done in triplicate; BV173 vs Nalm 6 for each effector T-cell population: ns).

**A**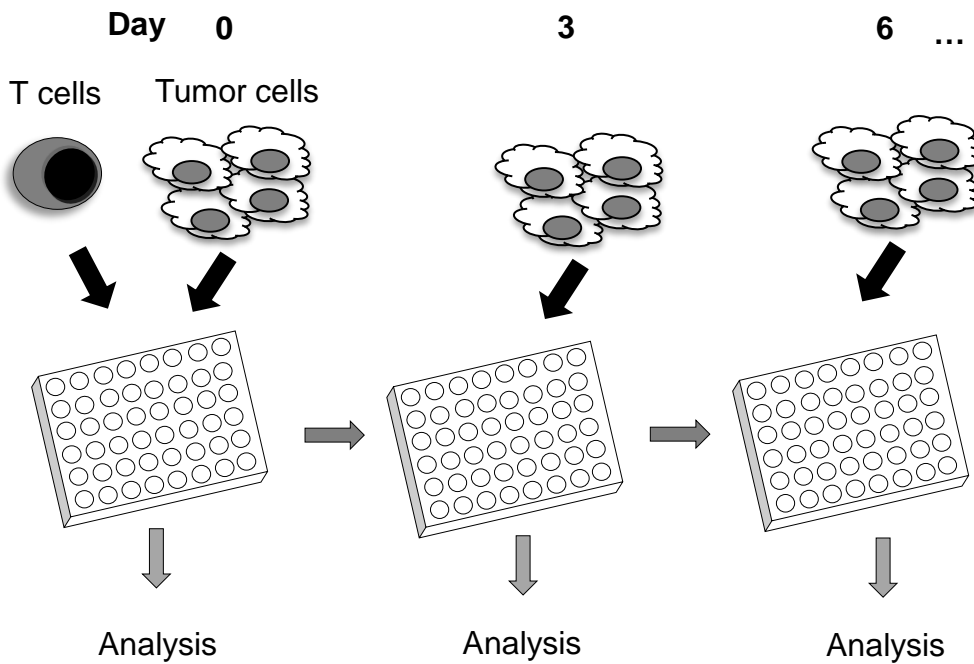**B**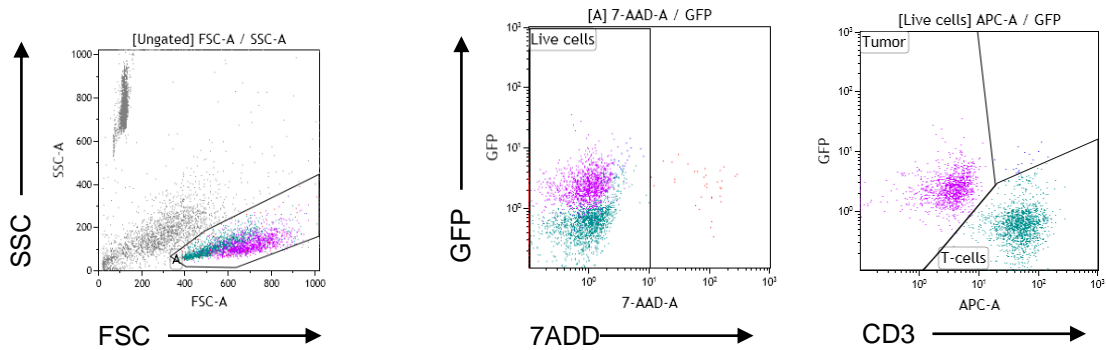

**Supplementary Figure 4: Experimental set up of Serial Killing Assay.** (A) T cells and GFP+ tumor cells (BV173 or Nalm6 cells) are plated at either 1:4 or 1:8 E:T ratio. An aliquot of cells is then analyzed using flow cytometry. Remaining cells are kept in culture and analyzed every 3-4 days. Fresh tumor cells are added at each time point. (B) Flow cytometry gating strategy.

**A****BV173; E:T ratio 1:8**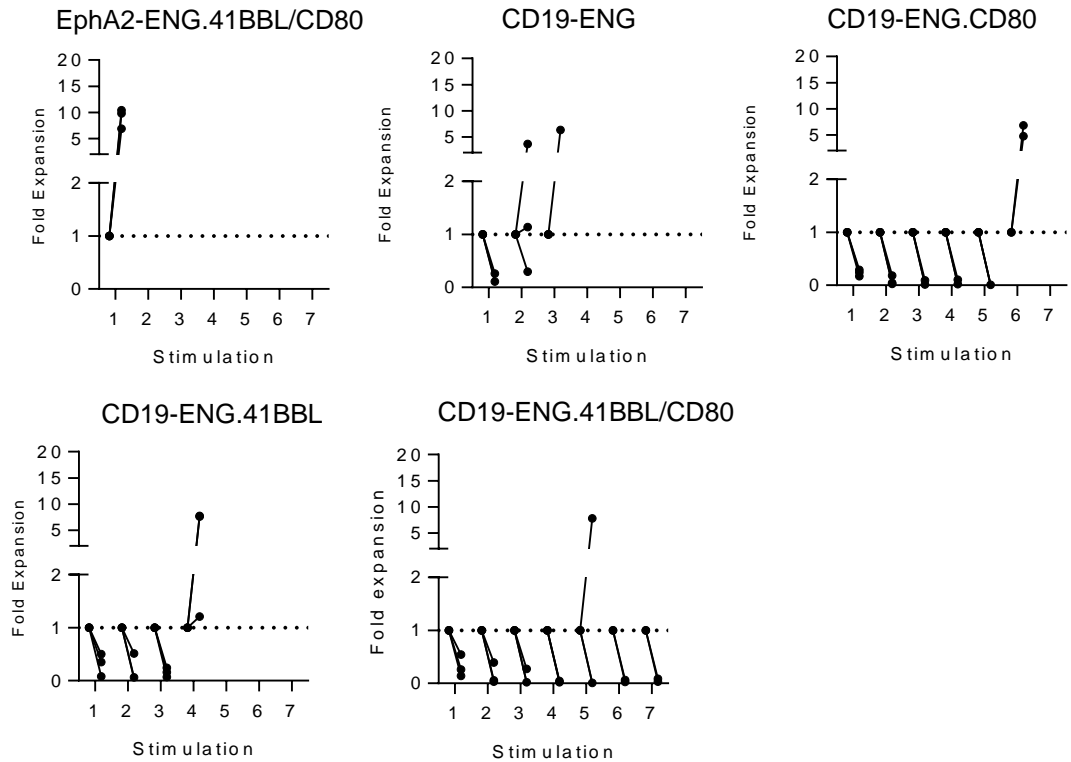**B****Nalm6; E:T ratio 1:8**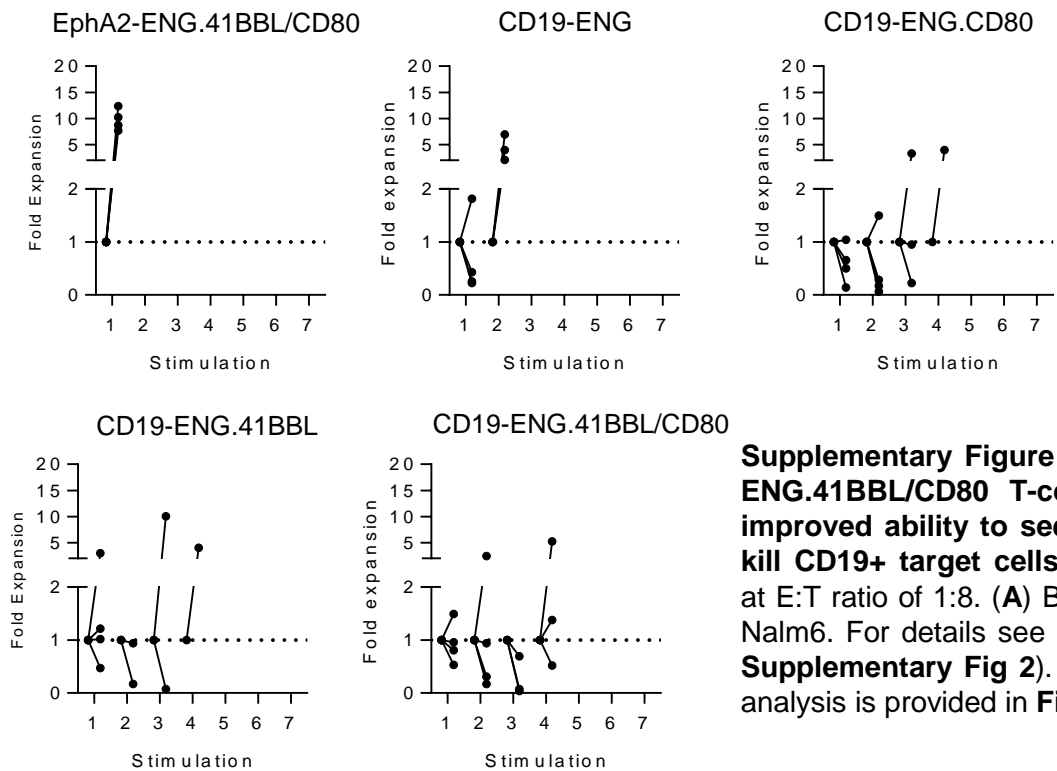

**Supplementary Figure 5: CD19-ENG.41BBL/CD80 T-cells have improved ability to sequentially kill CD19+ target cells.** Analysis at E:T ratio of 1:8. (A) BV173. (B) Nalm6. For details see Fig 4 and Supplementary Fig 2). Statistical analysis is provided in Fig 5B.

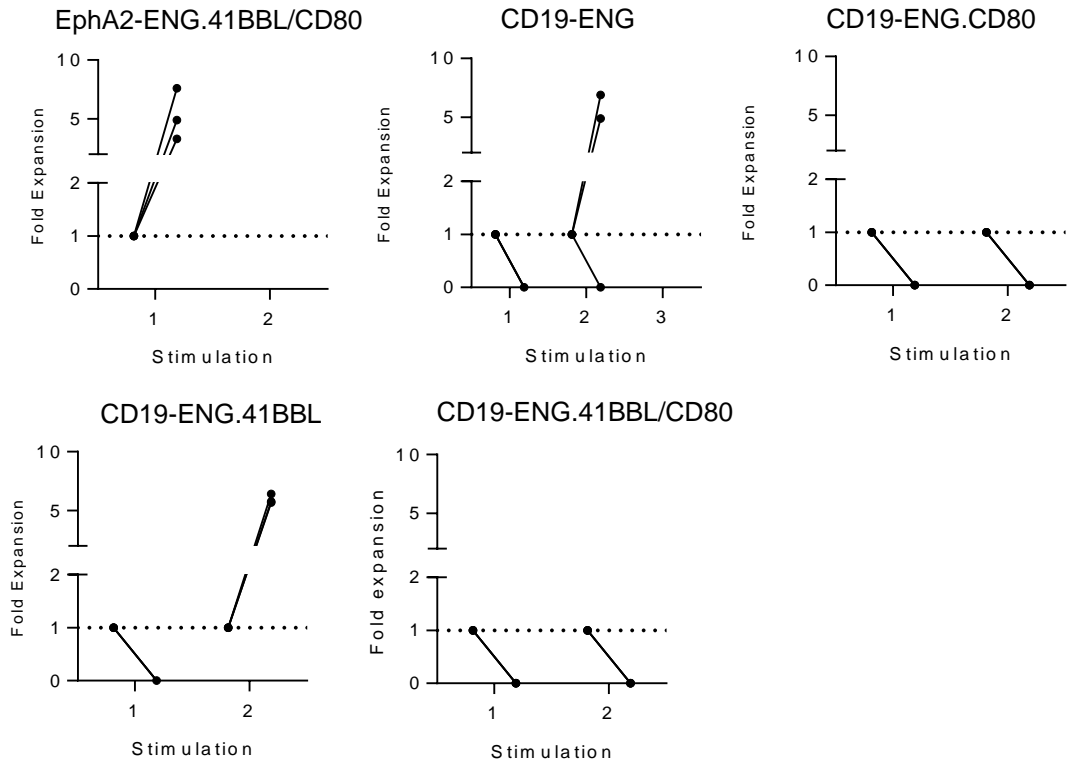

**Supplementary Figure 6: CD19-ENG T-cells expressing CD80 or 41BBL and CD80 have improved ability to sequentially kill CD19+ target cells.** T cells were cocultured with tumor cells at E:T ratio of 1:1 with BV173 cells. After 5 days, cells were harvested and the presence of tumor cells enumerated by FACS analysis. If greater than 90% of tumor cells were killed, T cells were cocultured again with BV173 cells and after 5 days number of tumor cells were enumerated (n=3).

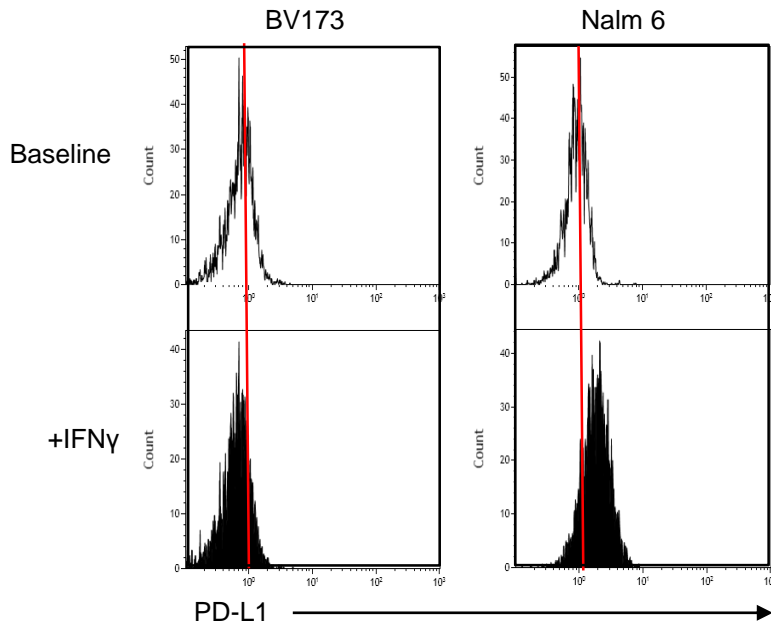

**Supplementary Figure 7: Nalm 6 express PD-L1 after exposure to IFN $\gamma$ .** Nalm 6 and BV173 cell lines were stained for PD-L1 (BD Biosciences) at baseline (open curve) and 48 hours after exposure to IFN $\gamma$  (7500 pg/mL; filled curve).

**A**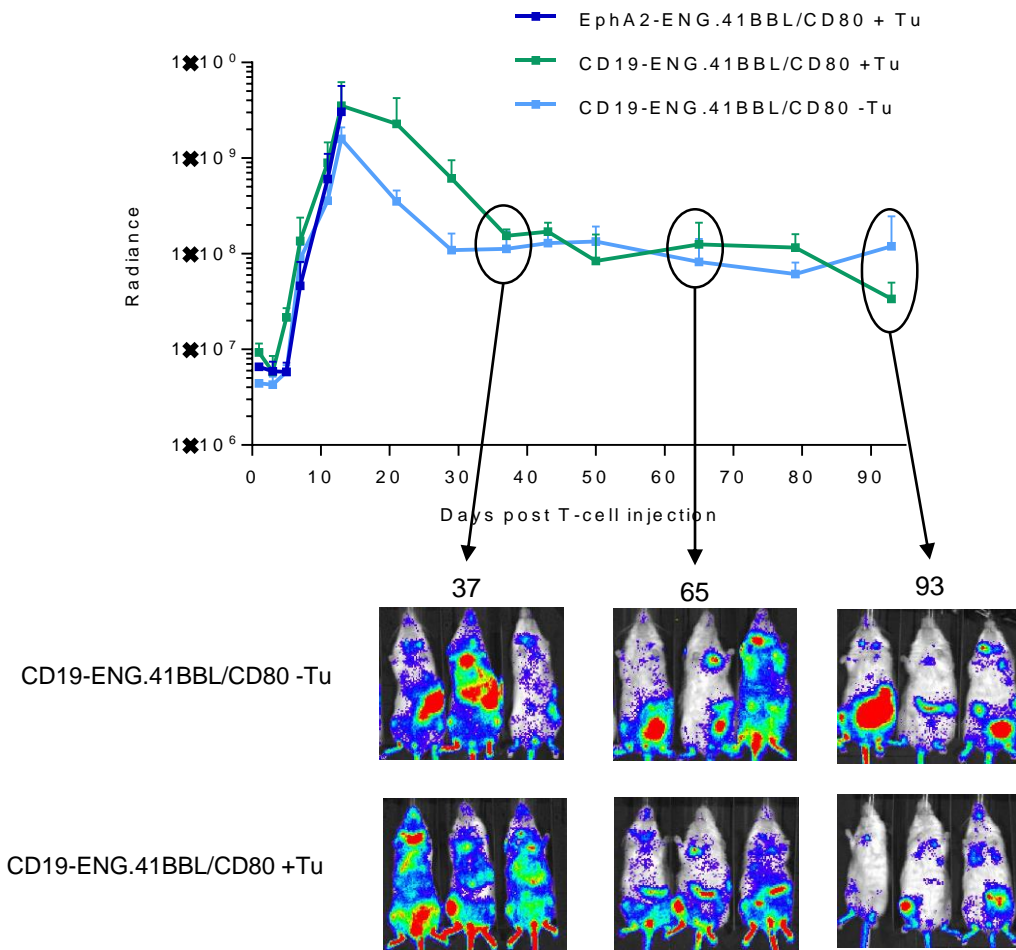**B**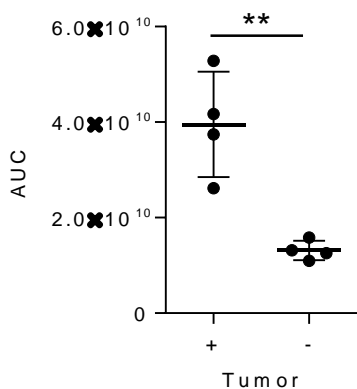**C**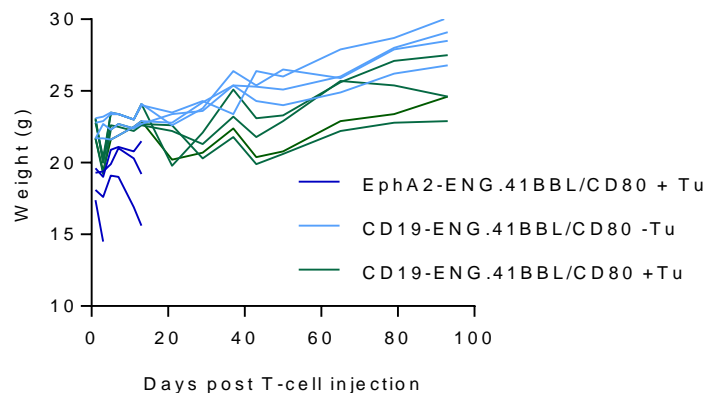

**Supplementary Figure 8: CD19 ENG.41BBL/CD80 T-cells expand *in vivo* and persist long-term at low levels.** This is the long-term follow up of the experiment shown in Figure 7. Please see figure legend for detail. **(A)** Bioluminescence imaging (mean and SD) of whole mouse. **(B)** Area under curve (AUC) analysis until day 37 post T-cell injection using a base line radiance of  $1 \times 10^7$  for CD19 ENG.41BBL/CD80 T-cells +/- tumor (+ vs - tumor:  $**p < 0.01$ ). **(C)** Weight measurements (each line represents an individual mouse).
